# Supplementary material
Source: publisher figshare collection journal article supplement (https://gsajournals.figshare.com/articles/dataset/_/9913937)

Fig S1

A

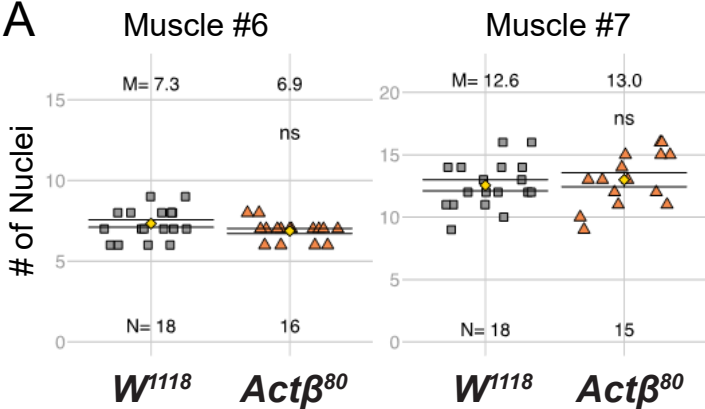

B

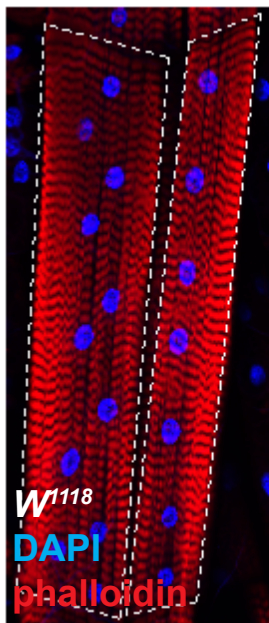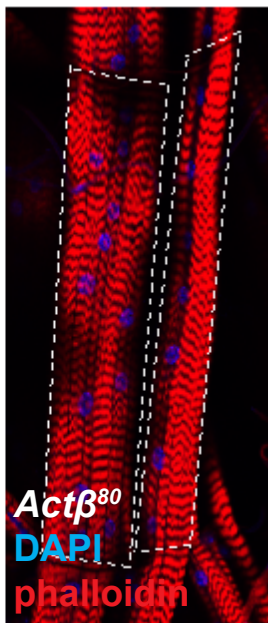

Fig S2

Proventriculus

*Actβ*<sup>80/+</sup>

*Actβ*<sup>80/80</sup>

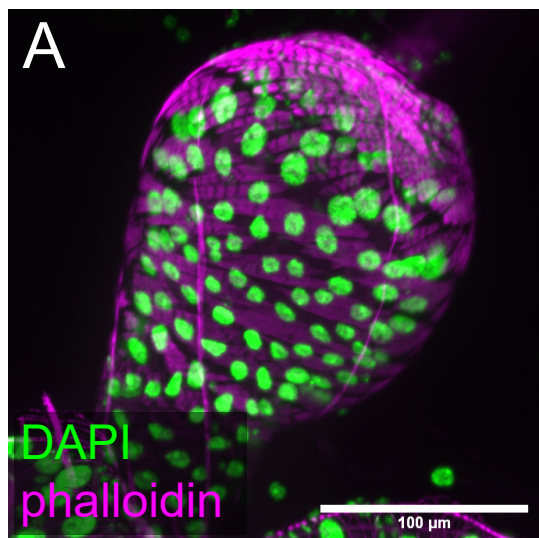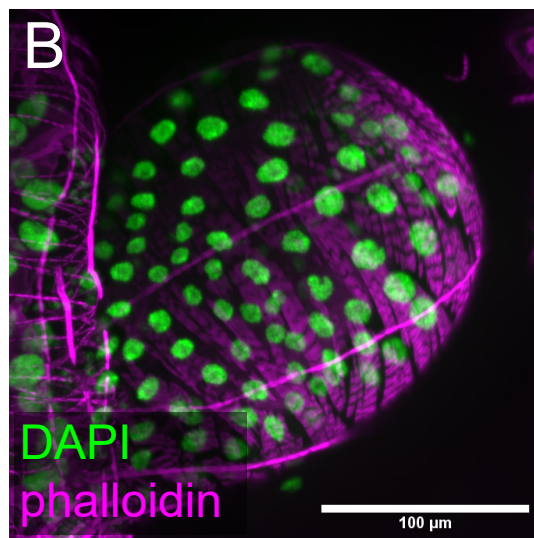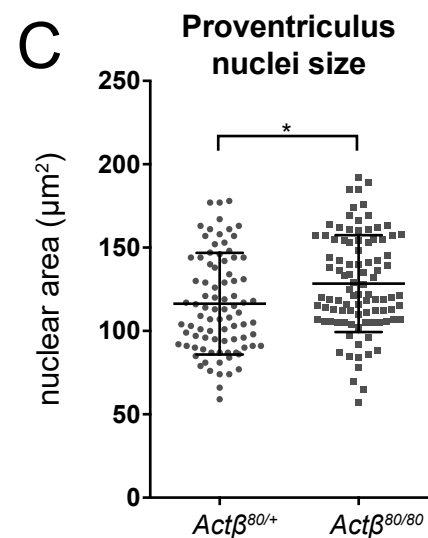

Salivary Gland

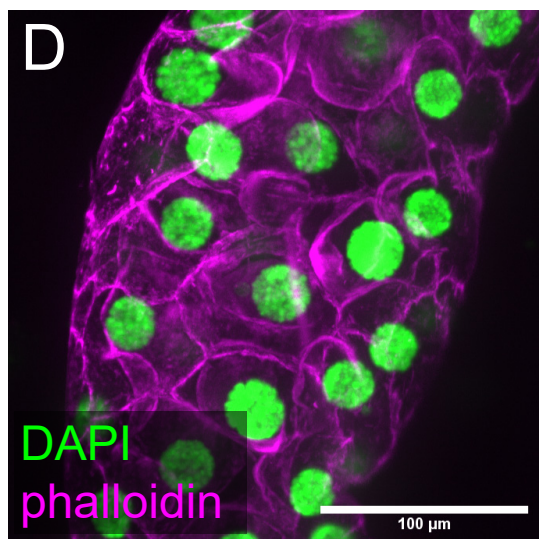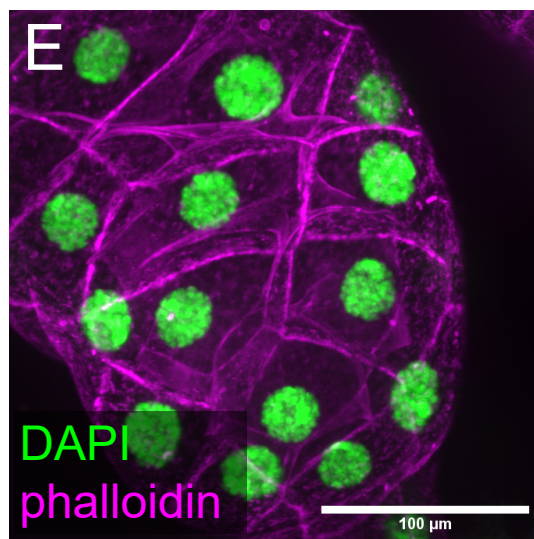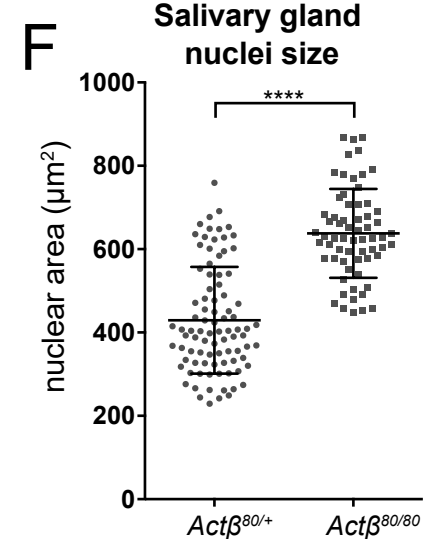

PG cells

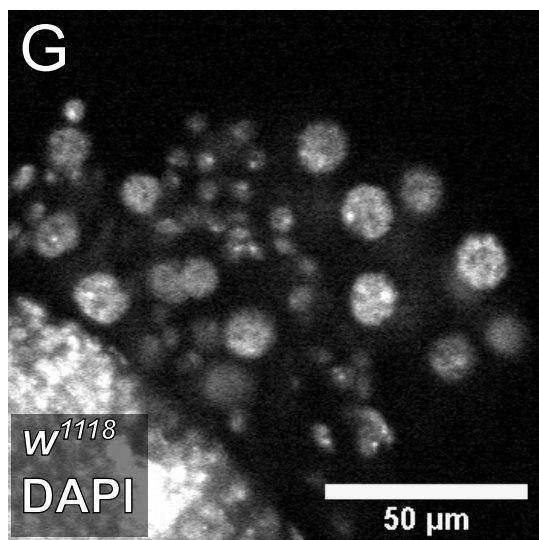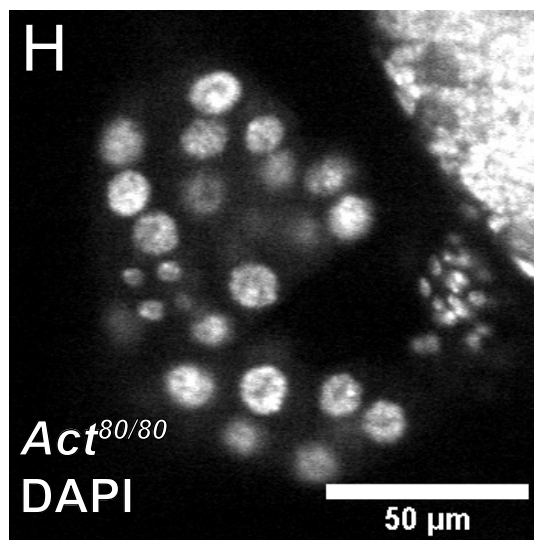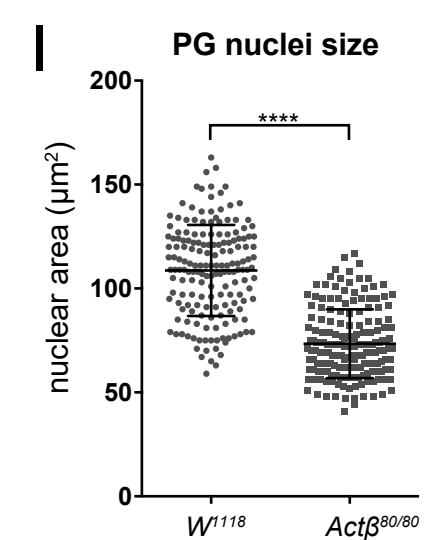

Fig S3

Act $\beta$ (27A3)>GFP

Act $\beta$ (2A2)>GFP

exposure time

0.37s

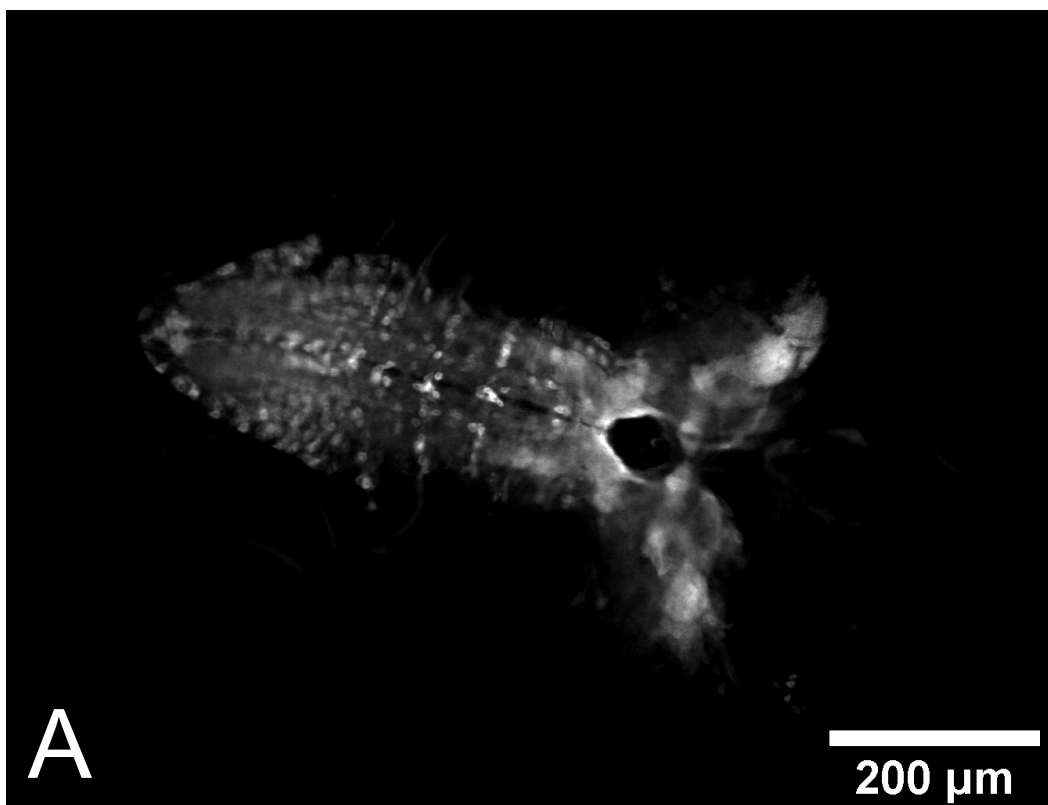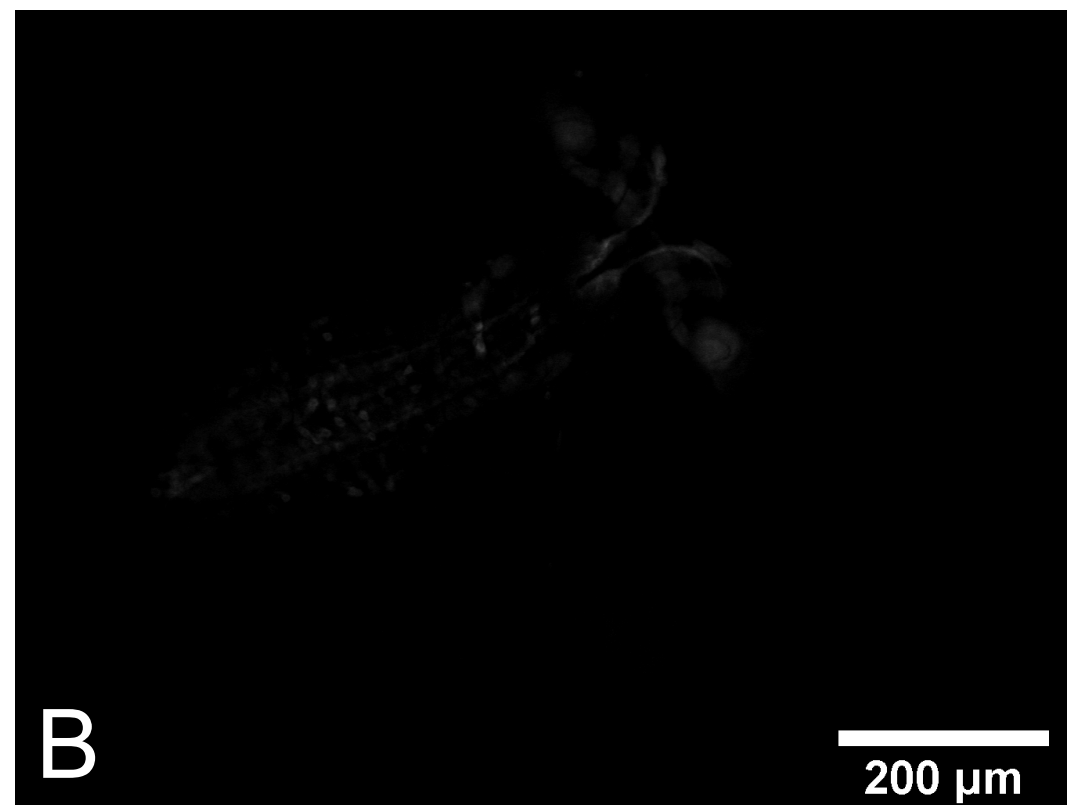

2.38s

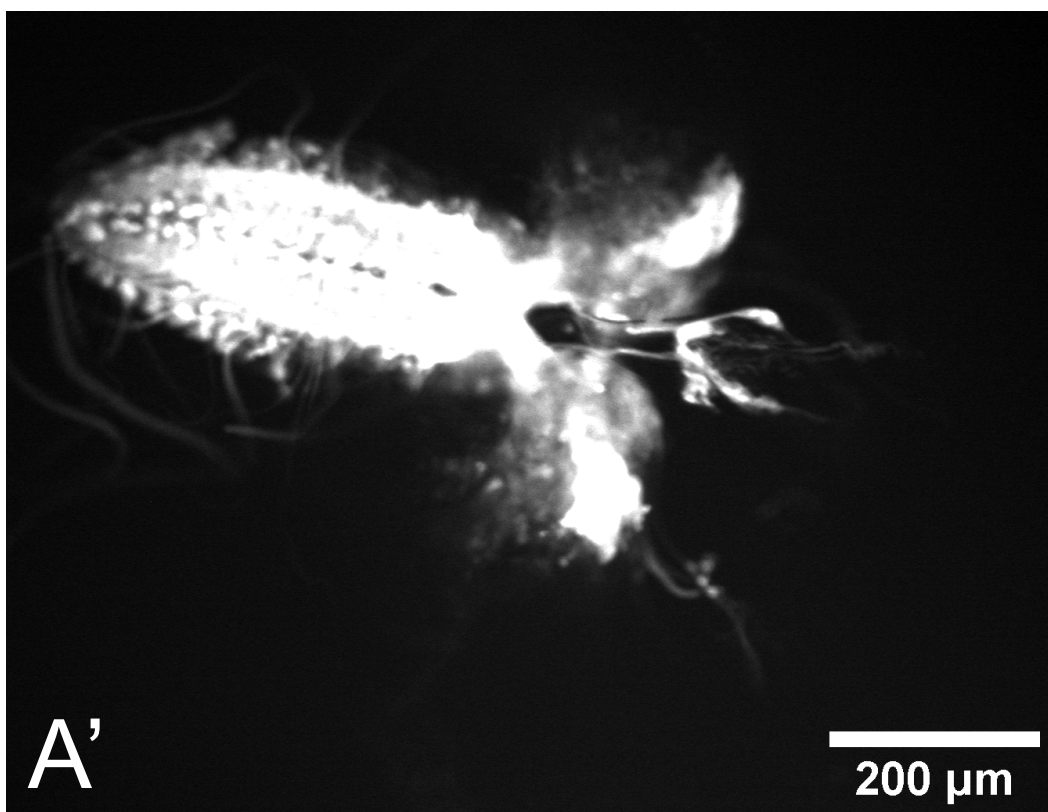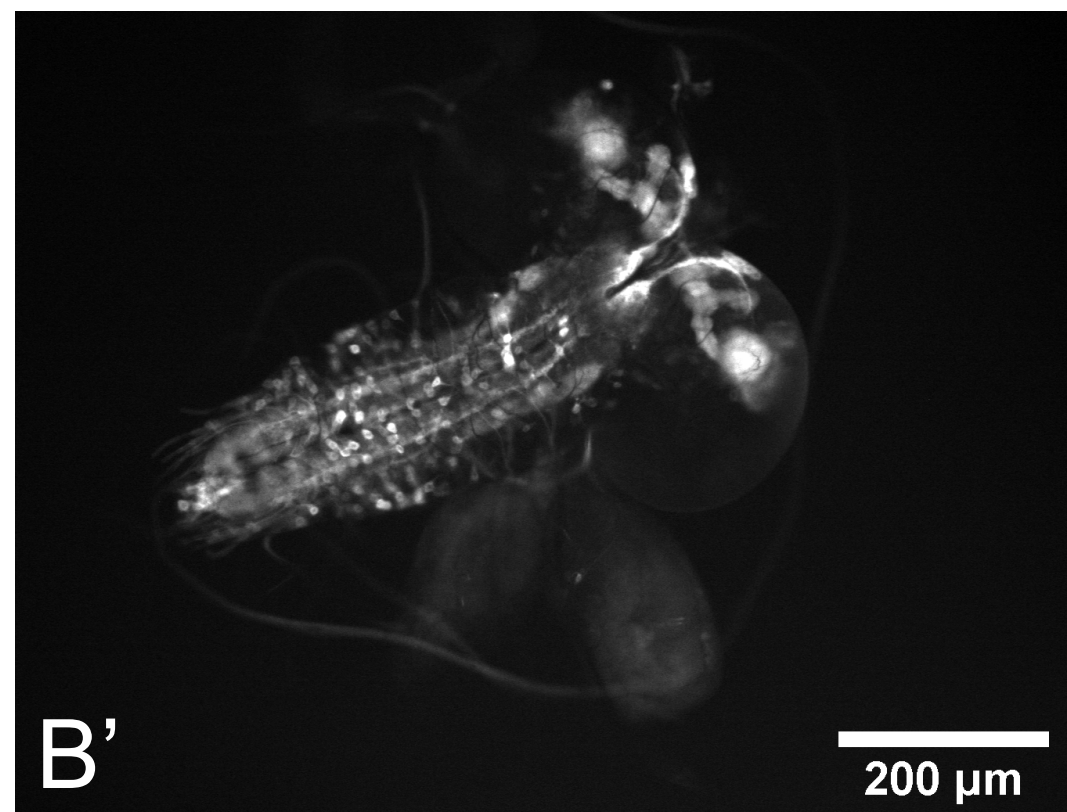



**Fig S4**

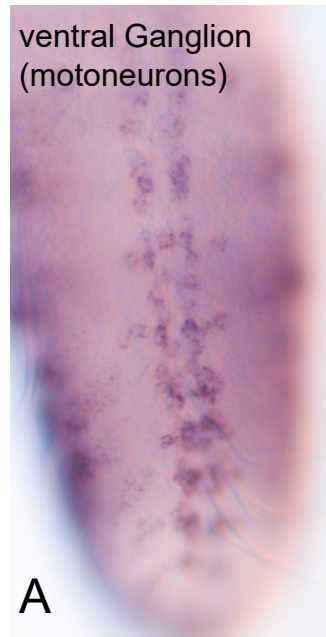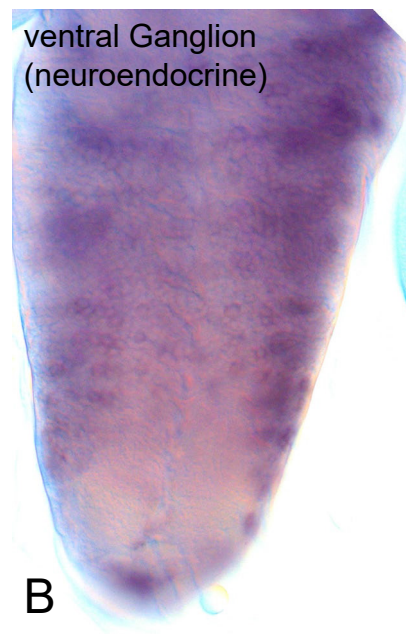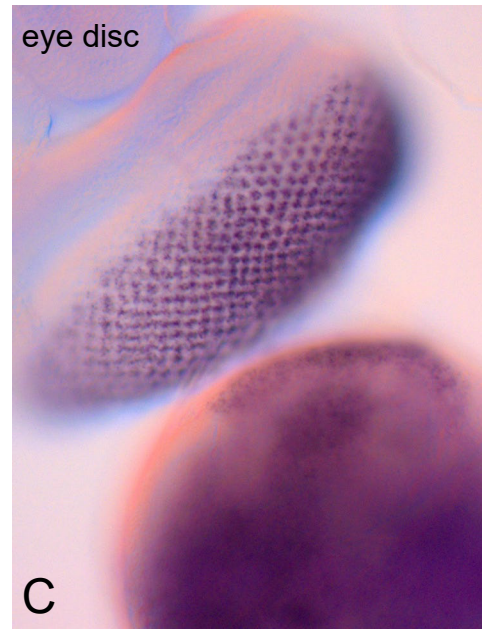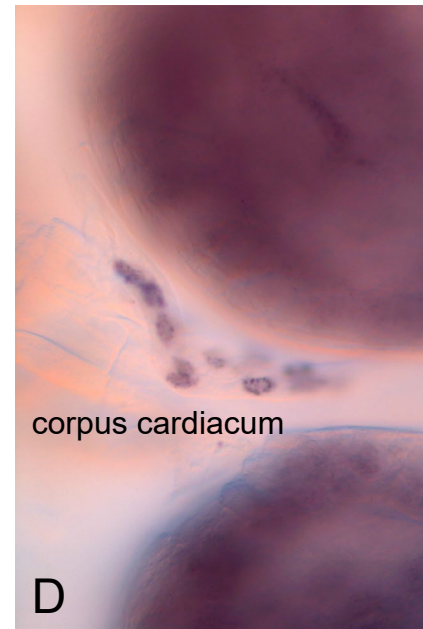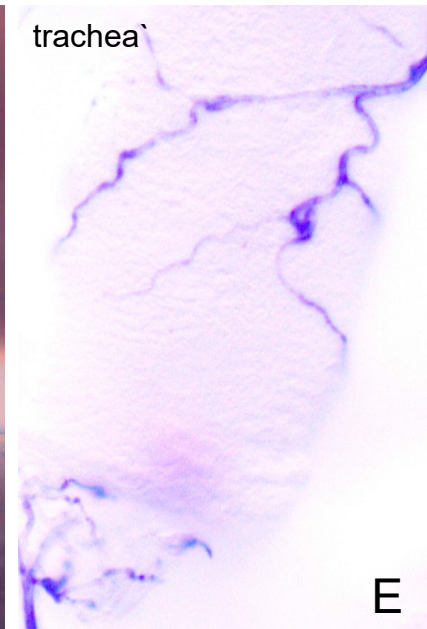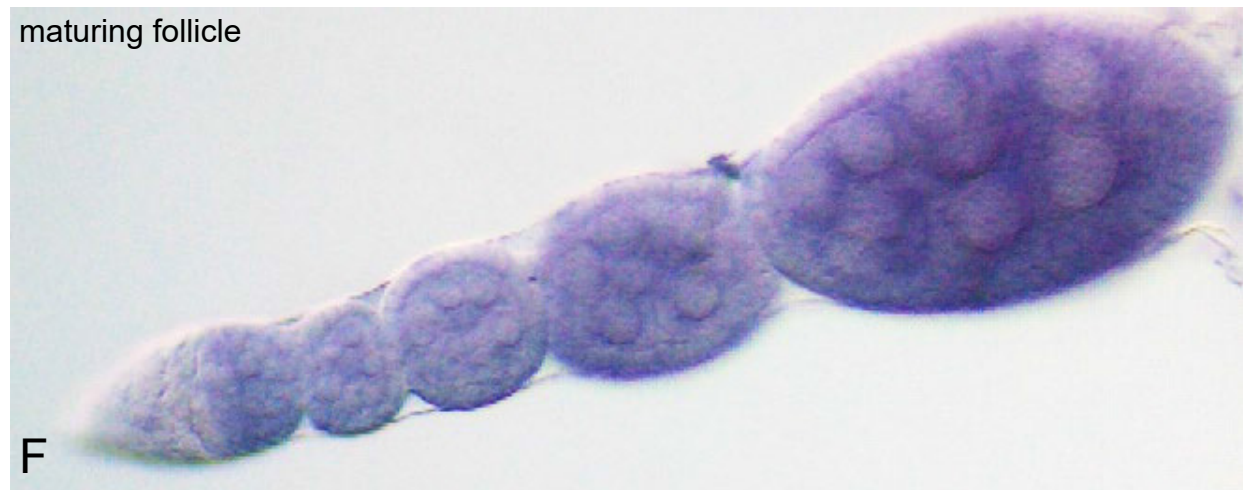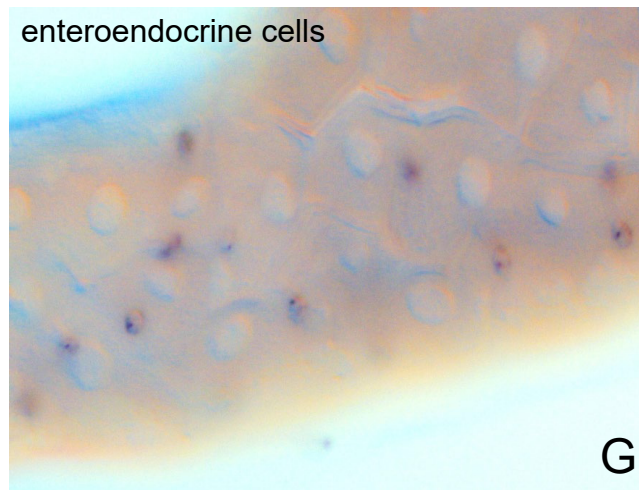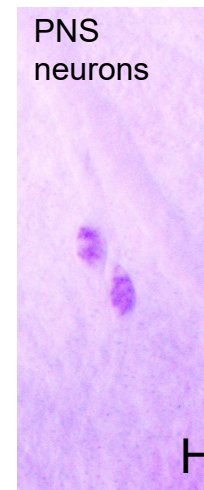

Fig S5

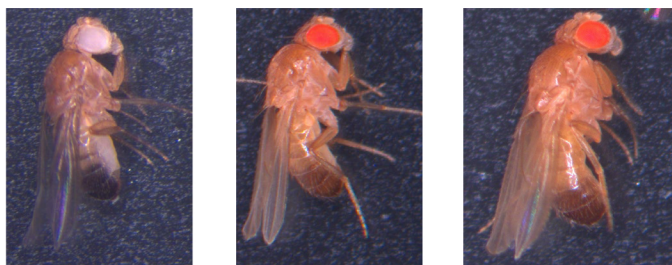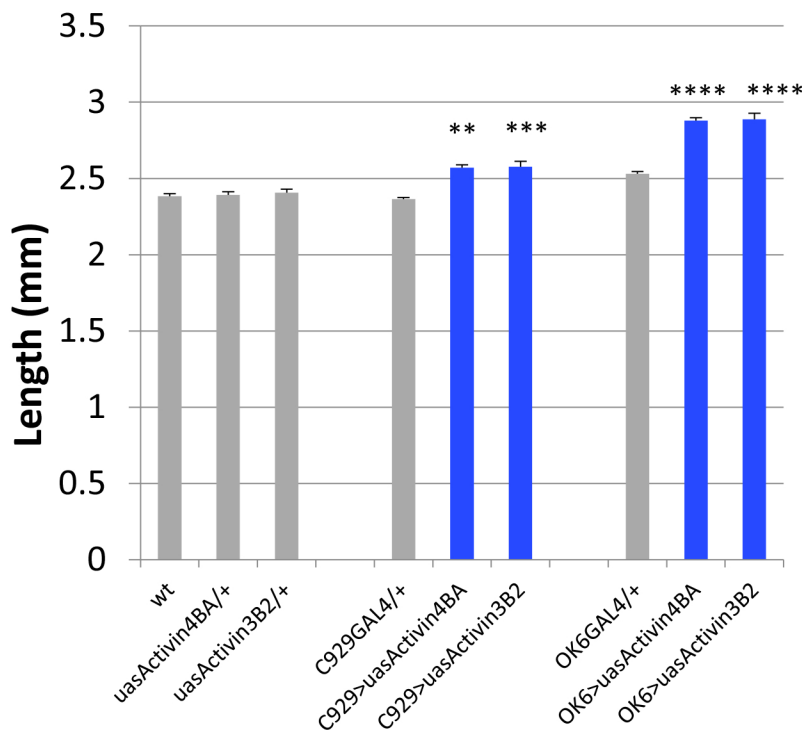



Fig S6

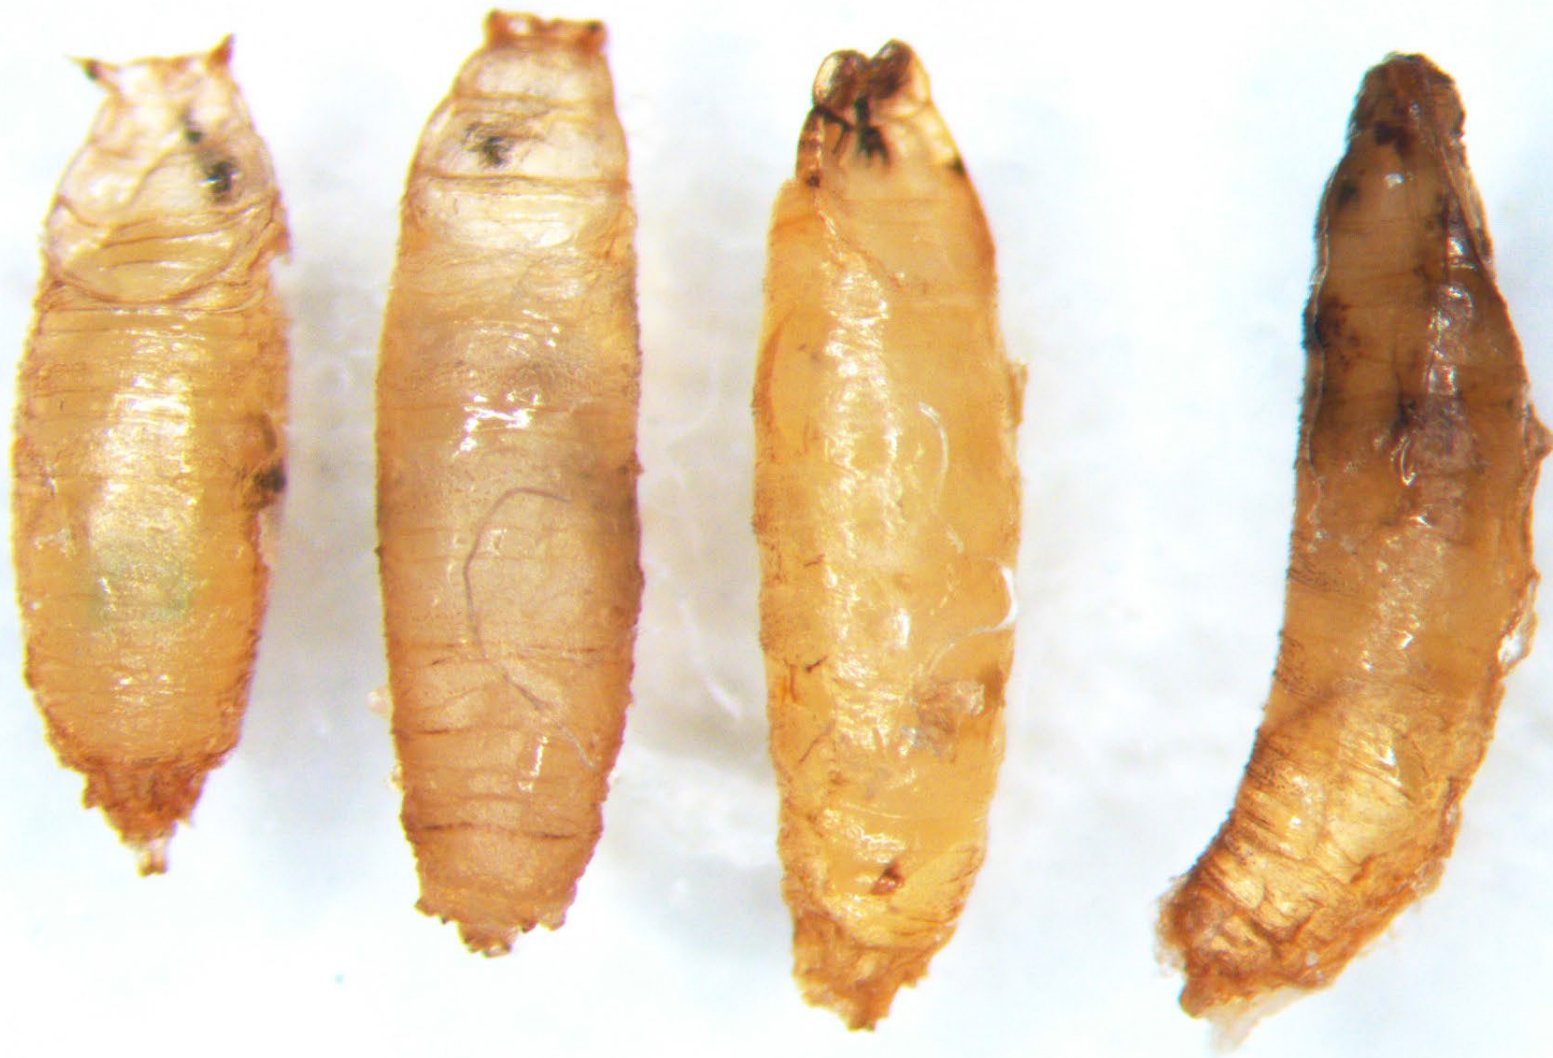

*UAS-Babo<sup>CA</sup>*

*UAS-Act $\beta$*

*UAS-Babo<sup>CA</sup>*

*UAS-Act $\beta$*

---

*Cg-Gal4*  
(fat-body)

---

*MHC-Gal4*  
(muscle)

Fig S7

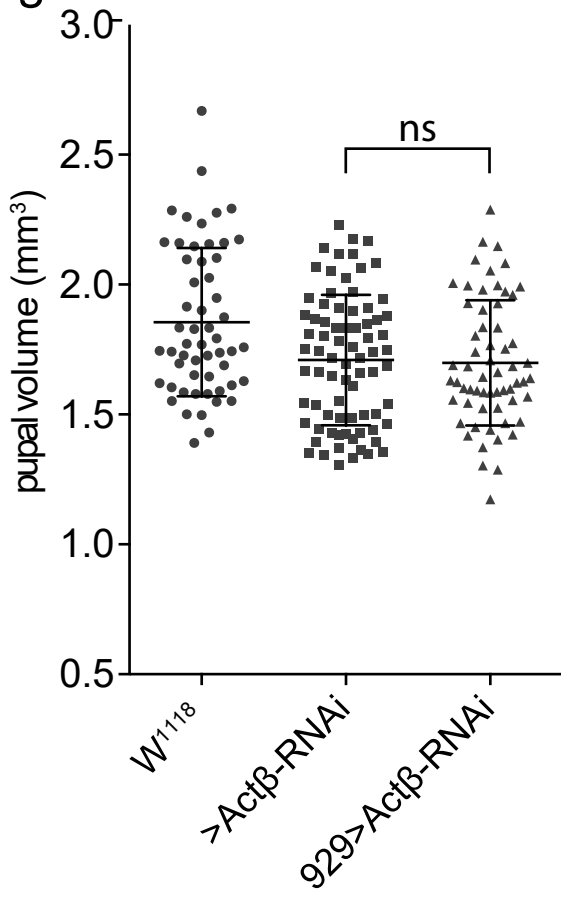

Fig S8

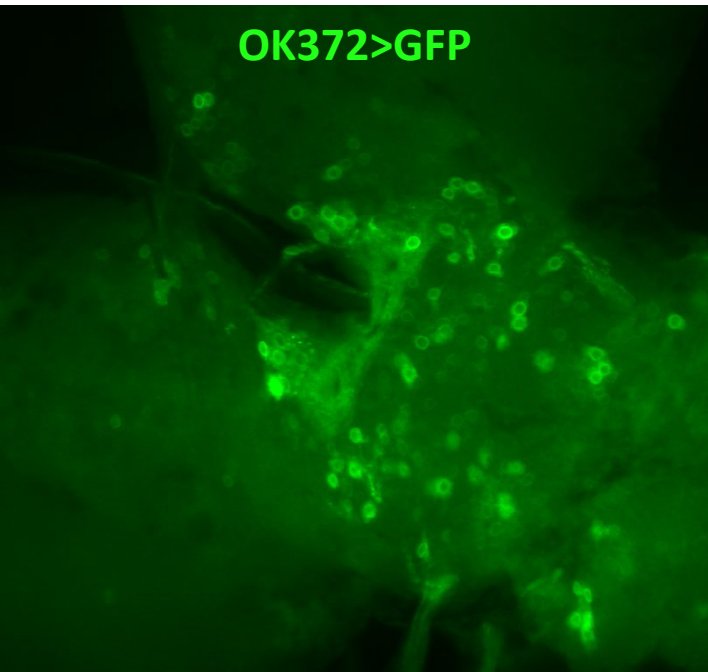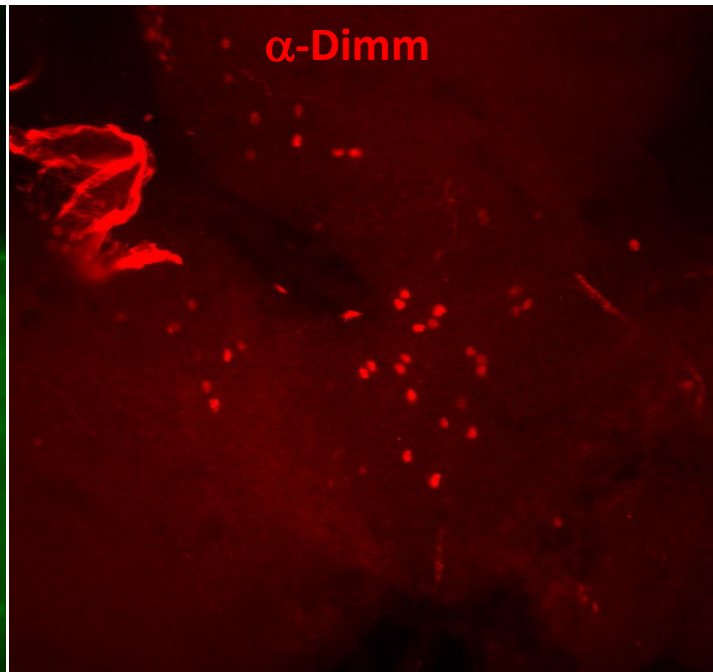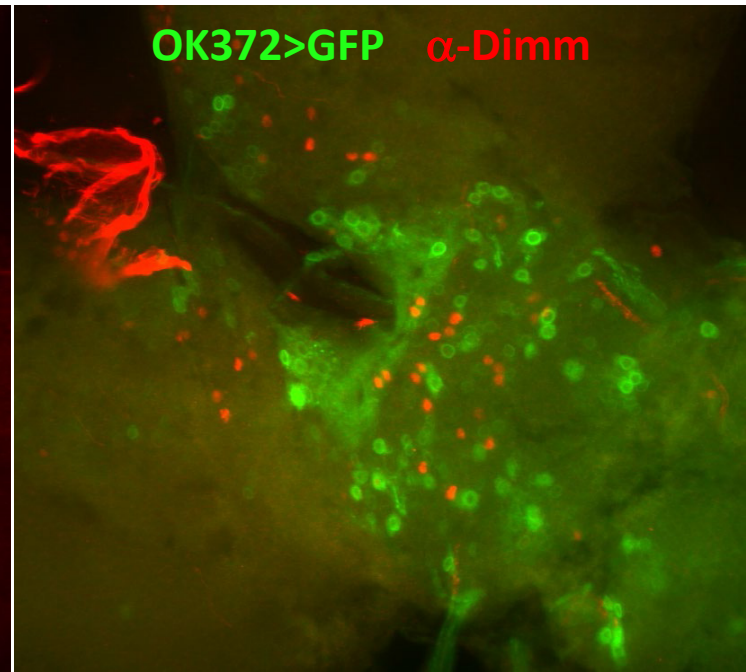



Fig S9

# A

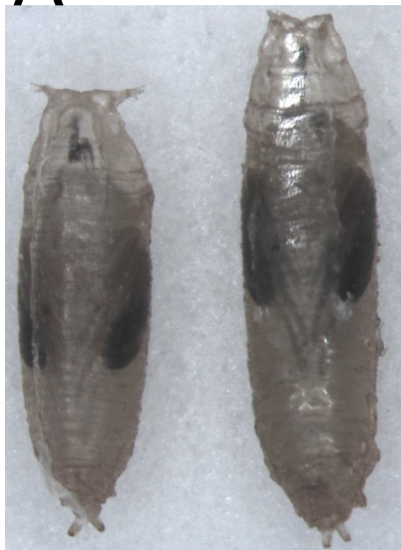

**MHC>**

**MHC> Babo<sup>CA</sup>**

# B

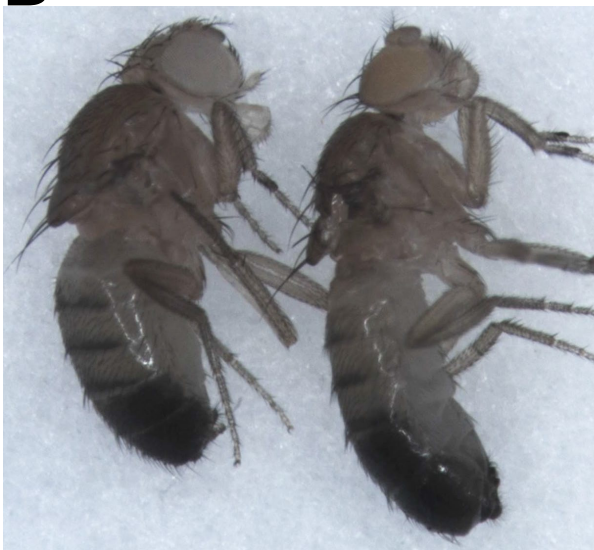

## MHC>

## MHC> Babo<sup>CA</sup>

C

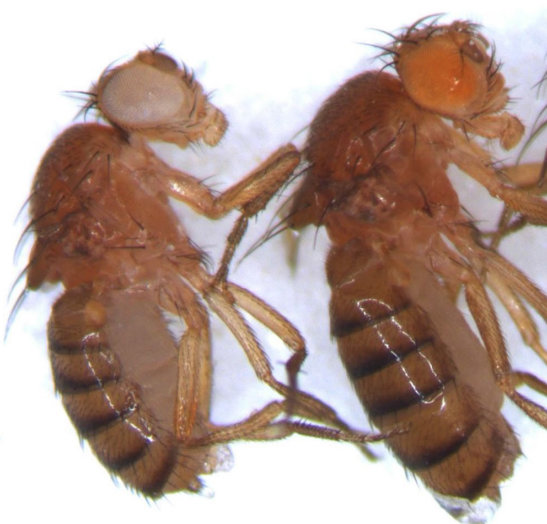

**MHC>**

**MHC> dSmad2<sup>CA</sup>**

D

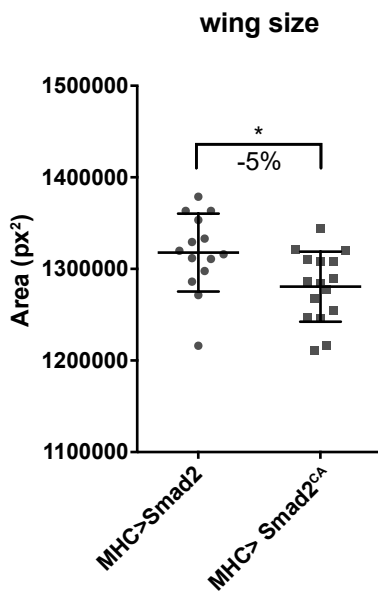

Supplement: Supplementary file 1 [file 1]
